# Supplementary material for: Computational Imaging Biomarker Correlation with Intraocular Cytokine Expression in Diabetic Macular Edema: Radiomics Insights from the IMAGINE Study
Source: PubMed Central journal article supplement — Ophthalmol Sci. 2022 Feb 4;2(2):100123. doi: 10.1016/j.xops.2022.100123 (PMC9560558; doi:10.1016/j.xops.2022.100123), 2022-02-04
Supplement: mmc2.pdf [file mmc2.pdf]

PCC=-0.46, p=0.03,  $\beta_0=38.01$ ,  $\beta_1=-11.3$ ,  
 $R^2=0.22$ , RSE=2.43

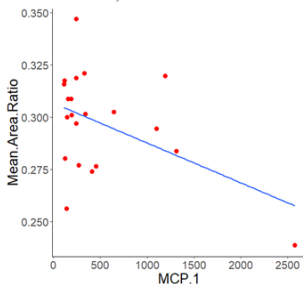

(a)

PCC=-0.49, p=0.02,  $\beta_0=131.1$ ,  $\beta_1=-61.5$ ,  
 $R^2=0.24$ , RSE=3.87

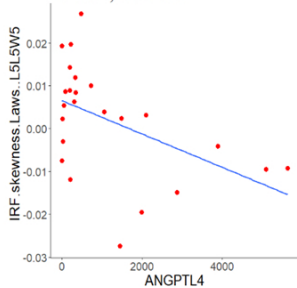

(b)

PCC=0.53, p=0.008,  $\beta_0=115.1$ ,  $\beta_1=-6.75$ ,  
 $R^2=0.28$ , RSE=2.42

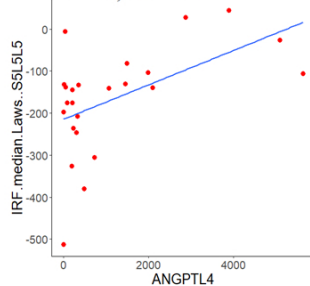

(c)

PCC=-0.42, p=0.04,  $\beta_0=250.2$ ,  $\beta_1=-35.1$ ,  
 $R^2=0.18$ , RSE=1.5

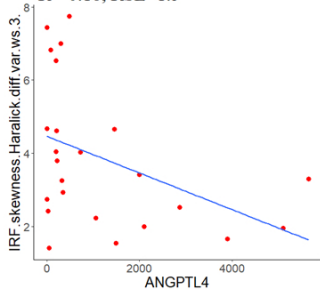

(d)

PCC=-0.42, p=0.04,  $\beta_0=265.6$ ,  $\beta_1=-40.9$ ,  
 $R^2=0.17$ , RSE=3.91

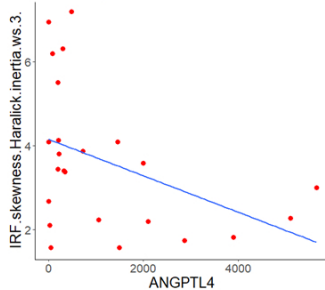

(e)

PCC=0.47, p=0.02,  $\beta_0=354.16$ ,  $\beta_1=0.65$ ,  
 $R^2=0.22$ , RSE=4.8

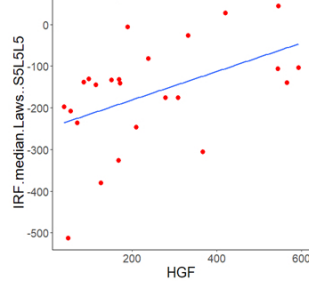

(f)

PCC=0.41, p=0.004,  $\beta_0=17.05$ ,  $\beta_1=9.95$ ,  
 $R^2=0.17$ , RSE=4.9

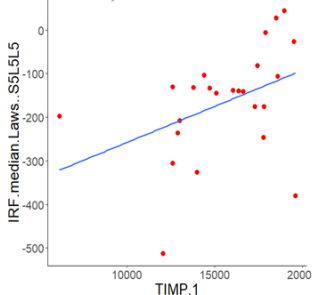

(g)

PCC=0.59, p=0.04,  $\beta_0=462.38$ ,  $\beta_1=0.64$ ,  
 $R^2=0.35$ , RSE=3.4

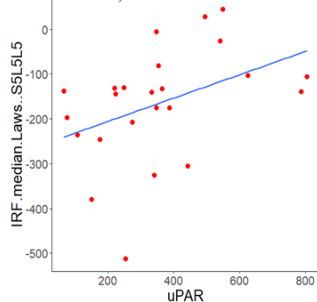

(h)
